# Supplementary material for: Functional characterization and gene expression profiling of Drosophila melanogaster short dADA2b isoform-containing dSAGA complexes
Source: PubMed Central journal article supplement (PMC3598691; doi:10.1186/1471-2164-14-44), 2013-01-22
Supplement: 1471-2164-14-44-S2.pdf [file 1471-2164-14-44-S2.pdf]

|                                           |        |        |        |       |       |       |          |          |     |                                                                                                                                                                                                                                                                                                                                                                                                                                                                                                                                                                                                                                                                                                                                                                                                                                                                                                                                                                                                                                                                                                                                                                                                                                                                                                                                                                                                                                                                                                                                                                                                                                                                                                                            |
|-------------------------------------------|--------|--------|--------|-------|-------|-------|----------|----------|-----|----------------------------------------------------------------------------------------------------------------------------------------------------------------------------------------------------------------------------------------------------------------------------------------------------------------------------------------------------------------------------------------------------------------------------------------------------------------------------------------------------------------------------------------------------------------------------------------------------------------------------------------------------------------------------------------------------------------------------------------------------------------------------------------------------------------------------------------------------------------------------------------------------------------------------------------------------------------------------------------------------------------------------------------------------------------------------------------------------------------------------------------------------------------------------------------------------------------------------------------------------------------------------------------------------------------------------------------------------------------------------------------------------------------------------------------------------------------------------------------------------------------------------------------------------------------------------------------------------------------------------------------------------------------------------------------------------------------------------|
| CG11523                                   | 98.4   | 188.8  | 198.3  | 0.94  | 1.01  | 0.07  | 1.34E-03 | 3.85E-01 | --- | protein binding                                                                                                                                                                                                                                                                                                                                                                                                                                                                                                                                                                                                                                                                                                                                                                                                                                                                                                                                                                                                                                                                                                                                                                                                                                                                                                                                                                                                                                                                                                                                                                                                                                                                                                            |
| CG12115                                   | 460.4  | 2233.3 | 1461.1 | 2.28  | 1.67  | -0.61 | 1.64E-02 | 1.79E-02 | --- | protein binding                                                                                                                                                                                                                                                                                                                                                                                                                                                                                                                                                                                                                                                                                                                                                                                                                                                                                                                                                                                                                                                                                                                                                                                                                                                                                                                                                                                                                                                                                                                                                                                                                                                                                                            |
| CG7251                                    | 50.5   | 64.4   | 104.6  | 0.35  | 1.05  | 0.70  | 4.56E-02 | 1.70E-01 | --- | protein binding                                                                                                                                                                                                                                                                                                                                                                                                                                                                                                                                                                                                                                                                                                                                                                                                                                                                                                                                                                                                                                                                                                                                                                                                                                                                                                                                                                                                                                                                                                                                                                                                                                                                                                            |
| CG13067                                   | 75.4   | 292.4  | 249.3  | 1.95  | 1.72  | -0.23 | 7.61E-03 | 2.25E-01 | --- | protein binding                                                                                                                                                                                                                                                                                                                                                                                                                                                                                                                                                                                                                                                                                                                                                                                                                                                                                                                                                                                                                                                                                                                                                                                                                                                                                                                                                                                                                                                                                                                                                                                                                                                                                                            |
| CG1314                                    | 25.6   | 25.5   | 55.2   | -0.01 | 1.11  | 1.12  | 4.20E-02 | 9.87E-02 | --- | protein binding                                                                                                                                                                                                                                                                                                                                                                                                                                                                                                                                                                                                                                                                                                                                                                                                                                                                                                                                                                                                                                                                                                                                                                                                                                                                                                                                                                                                                                                                                                                                                                                                                                                                                                            |
| CG13245                                   | 145.6  | 218.0  | 231.5  | 0.58  | 0.67  | 0.09  | 1.02E-01 | 4.61E-01 | --- | protein binding                                                                                                                                                                                                                                                                                                                                                                                                                                                                                                                                                                                                                                                                                                                                                                                                                                                                                                                                                                                                                                                                                                                                                                                                                                                                                                                                                                                                                                                                                                                                                                                                                                                                                                            |
| CG10307                                   | 17.3   | 24.3   | 34.9   | 0.49  | 1.02  | 0.52  | 4.92E-02 | 2.64E-01 | --- | protein binding                                                                                                                                                                                                                                                                                                                                                                                                                                                                                                                                                                                                                                                                                                                                                                                                                                                                                                                                                                                                                                                                                                                                                                                                                                                                                                                                                                                                                                                                                                                                                                                                                                                                                                            |
| CG14383                                   | 13.7   | 20.8   | 23.4   | 0.61  | 0.78  | 0.17  | 2.01E-01 | 4.33E-01 | --- | protein binding                                                                                                                                                                                                                                                                                                                                                                                                                                                                                                                                                                                                                                                                                                                                                                                                                                                                                                                                                                                                                                                                                                                                                                                                                                                                                                                                                                                                                                                                                                                                                                                                                                                                                                            |
| CG10510                                   | 24.6   | 39.3   | 64.1   | 0.68  | 1.38  | 0.71  | 1.07E-02 | 1.54E-01 | --- | protein binding                                                                                                                                                                                                                                                                                                                                                                                                                                                                                                                                                                                                                                                                                                                                                                                                                                                                                                                                                                                                                                                                                                                                                                                                                                                                                                                                                                                                                                                                                                                                                                                                                                                                                                            |
| CG3610                                    | 32.0   | 48.7   | 72.6   | 0.61  | 1.18  | 0.58  | 4.54E-02 | 2.18E-01 | --- | protein binding                                                                                                                                                                                                                                                                                                                                                                                                                                                                                                                                                                                                                                                                                                                                                                                                                                                                                                                                                                                                                                                                                                                                                                                                                                                                                                                                                                                                                                                                                                                                                                                                                                                                                                            |
| CG2871                                    | 37.6   | 58.1   | 71.1   | 0.63  | 0.92  | 0.29  | 3.00E-02 | 3.43E-01 | --- | protein binding                                                                                                                                                                                                                                                                                                                                                                                                                                                                                                                                                                                                                                                                                                                                                                                                                                                                                                                                                                                                                                                                                                                                                                                                                                                                                                                                                                                                                                                                                                                                                                                                                                                                                                            |
| Male-specific RNA 98Ca                    | 346.8  | 449.5  | 701.5  | 0.37  | 1.02  | 0.64  | 5.47E-02 | 2.32E-01 | --- | protein binding                                                                                                                                                                                                                                                                                                                                                                                                                                                                                                                                                                                                                                                                                                                                                                                                                                                                                                                                                                                                                                                                                                                                                                                                                                                                                                                                                                                                                                                                                                                                                                                                                                                                                                            |
| CG11820                                   | 274.7  | 408.5  | 369.9  | 0.57  | 0.43  | -0.14 | 1.87E-01 | 4.39E-01 | --- | protein binding                                                                                                                                                                                                                                                                                                                                                                                                                                                                                                                                                                                                                                                                                                                                                                                                                                                                                                                                                                                                                                                                                                                                                                                                                                                                                                                                                                                                                                                                                                                                                                                                                                                                                                            |
| CG18266                                   | 53.3   | 73.3   | 107.4  | 0.46  | 1.01  | 0.55  | 5.44E-02 | 2.58E-01 | --- | protein binding                                                                                                                                                                                                                                                                                                                                                                                                                                                                                                                                                                                                                                                                                                                                                                                                                                                                                                                                                                                                                                                                                                                                                                                                                                                                                                                                                                                                                                                                                                                                                                                                                                                                                                            |
| CG2217                                    | 23.9   | 49.4   | 118.7  | 1.05  | 2.31  | 1.27  | 1.66E-01 | 2.09E-01 | --- | protein binding                                                                                                                                                                                                                                                                                                                                                                                                                                                                                                                                                                                                                                                                                                                                                                                                                                                                                                                                                                                                                                                                                                                                                                                                                                                                                                                                                                                                                                                                                                                                                                                                                                                                                                            |
| CG8292                                    | 21.4   | 43.0   | 53.8   | 1.00  | 1.33  | 0.32  | 5.01E-03 | 3.33E-01 | --- | protein binding                                                                                                                                                                                                                                                                                                                                                                                                                                                                                                                                                                                                                                                                                                                                                                                                                                                                                                                                                                                                                                                                                                                                                                                                                                                                                                                                                                                                                                                                                                                                                                                                                                                                                                            |
| CG13462                                   | 572.3  | 1811.9 | 1527.7 | 1.66  | 1.42  | -0.25 | 1.79E-03 | 4.62E-02 | --- | protein binding                                                                                                                                                                                                                                                                                                                                                                                                                                                                                                                                                                                                                                                                                                                                                                                                                                                                                                                                                                                                                                                                                                                                                                                                                                                                                                                                                                                                                                                                                                                                                                                                                                                                                                            |
| CG10229                                   | 56.7   | 85.4   | 126.9  | 0.59  | 1.16  | 0.57  | 4.44E-02 | 2.73E-01 | --- | protein binding                                                                                                                                                                                                                                                                                                                                                                                                                                                                                                                                                                                                                                                                                                                                                                                                                                                                                                                                                                                                                                                                                                                                                                                                                                                                                                                                                                                                                                                                                                                                                                                                                                                                                                            |
| CG1244                                    | 27.4   | 44.0   | 52.4   | 0.88  | 0.93  | 0.25  | 2.76E-02 | 3.69E-01 | --- | protein binding                                                                                                                                                                                                                                                                                                                                                                                                                                                                                                                                                                                                                                                                                                                                                                                                                                                                                                                                                                                                                                                                                                                                                                                                                                                                                                                                                                                                                                                                                                                                                                                                                                                                                                            |
| CG13124                                   | 164.2  | 248.1  | 330.7  | 0.59  | 1.01  | 0.41  | 7.40E-02 | 3.14E-01 | --- | protein binding                                                                                                                                                                                                                                                                                                                                                                                                                                                                                                                                                                                                                                                                                                                                                                                                                                                                                                                                                                                                                                                                                                                                                                                                                                                                                                                                                                                                                                                                                                                                                                                                                                                                                                            |
| CG14154                                   | 23.4   | 35.2   | 50.9   | 0.59  | 1.12  | 0.53  | 7.36E-02 | 2.79E-01 | --- | protein binding                                                                                                                                                                                                                                                                                                                                                                                                                                                                                                                                                                                                                                                                                                                                                                                                                                                                                                                                                                                                                                                                                                                                                                                                                                                                                                                                                                                                                                                                                                                                                                                                                                                                                                            |
| CG6569                                    | 40.8   | 63.8   | 89.9   | 0.65  | 1.14  | 0.49  | 6.89E-02 | 2.72E-01 | --- | protein binding                                                                                                                                                                                                                                                                                                                                                                                                                                                                                                                                                                                                                                                                                                                                                                                                                                                                                                                                                                                                                                                                                                                                                                                                                                                                                                                                                                                                                                                                                                                                                                                                                                                                                                            |
| CG9192                                    | 46.9   | 107.1  | 101.5  | 1.19  | 1.11  | -0.08 | 1.43E-02 | 3.29E-01 | --- | protein binding                                                                                                                                                                                                                                                                                                                                                                                                                                                                                                                                                                                                                                                                                                                                                                                                                                                                                                                                                                                                                                                                                                                                                                                                                                                                                                                                                                                                                                                                                                                                                                                                                                                                                                            |
| CG30161                                   | 16.3   | 30.5   | 34.9   | 0.90  | 1.09  | 0.19  | 1.35E-01 | 4.22E-01 | --- | protein binding                                                                                                                                                                                                                                                                                                                                                                                                                                                                                                                                                                                                                                                                                                                                                                                                                                                                                                                                                                                                                                                                                                                                                                                                                                                                                                                                                                                                                                                                                                                                                                                                                                                                                                            |
| CG15878                                   | 23.4   | 39.8   | 54.1   | 0.76  | 1.21  | 0.44  | 1.85E-02 | 2.91E-01 | --- | protein binding                                                                                                                                                                                                                                                                                                                                                                                                                                                                                                                                                                                                                                                                                                                                                                                                                                                                                                                                                                                                                                                                                                                                                                                                                                                                                                                                                                                                                                                                                                                                                                                                                                                                                                            |
| CG2082                                    | 80.1   | 143.0  | 190.2  | 0.84  | 1.25  | 0.41  | 2.04E-02 | 1.16E-01 | --- | protein binding                                                                                                                                                                                                                                                                                                                                                                                                                                                                                                                                                                                                                                                                                                                                                                                                                                                                                                                                                                                                                                                                                                                                                                                                                                                                                                                                                                                                                                                                                                                                                                                                                                                                                                            |
| CG12377                                   | 12.8   | 17.9   | 27.8   | 0.48  | 1.12  | 0.64  | 6.10E-02 | 2.06E-01 | --- | protein binding                                                                                                                                                                                                                                                                                                                                                                                                                                                                                                                                                                                                                                                                                                                                                                                                                                                                                                                                                                                                                                                                                                                                                                                                                                                                                                                                                                                                                                                                                                                                                                                                                                                                                                            |
| CG14864                                   | 29.9   | 111.0  | 76.4   | 1.89  | 1.35  | -0.54 | 2.59E-02 | 5.61E-02 | --- | protein binding                                                                                                                                                                                                                                                                                                                                                                                                                                                                                                                                                                                                                                                                                                                                                                                                                                                                                                                                                                                                                                                                                                                                                                                                                                                                                                                                                                                                                                                                                                                                                                                                                                                                                                            |
| CG13843                                   | 18.9   | 32.8   | 46.8   | 0.79  | 1.31  | 0.51  | 7.32E-02 | 3.12E-01 | --- | protein binding                                                                                                                                                                                                                                                                                                                                                                                                                                                                                                                                                                                                                                                                                                                                                                                                                                                                                                                                                                                                                                                                                                                                                                                                                                                                                                                                                                                                                                                                                                                                                                                                                                                                                                            |
| CG13043                                   | 26.9   | 93.5   | 73.2   | 1.80  | 1.44  | -0.35 | 1.06E-03 | 8.30E-02 | --- | protein binding                                                                                                                                                                                                                                                                                                                                                                                                                                                                                                                                                                                                                                                                                                                                                                                                                                                                                                                                                                                                                                                                                                                                                                                                                                                                                                                                                                                                                                                                                                                                                                                                                                                                                                            |
| CG14183                                   | 39.7   | 54.6   | 80.2   | 0.46  | 1.01  | 0.55  | 2.15E-02 | 1.70E-01 | --- | protein binding /// ATP binding                                                                                                                                                                                                                                                                                                                                                                                                                                                                                                                                                                                                                                                                                                                                                                                                                                                                                                                                                                                                                                                                                                                                                                                                                                                                                                                                                                                                                                                                                                                                                                                                                                                                                            |
| Metallothionein A                         | 1206.4 | 2254.6 | 2748.3 | 0.90  | 1.19  | 0.29  | 1.06E-02 | 1.80E-01 | --- | protein binding /// metal ion binding /// metal ion binding                                                                                                                                                                                                                                                                                                                                                                                                                                                                                                                                                                                                                                                                                                                                                                                                                                                                                                                                                                                                                                                                                                                                                                                                                                                                                                                                                                                                                                                                                                                                                                                                                                                                |
| CG11253                                   | 52.1   | 62.6   | 113.4  | 0.26  | 1.12  | 0.86  | 6.83E-02 | 1.85E-01 | --- | protein binding /// zinc ion binding /// metal ion binding                                                                                                                                                                                                                                                                                                                                                                                                                                                                                                                                                                                                                                                                                                                                                                                                                                                                                                                                                                                                                                                                                                                                                                                                                                                                                                                                                                                                                                                                                                                                                                                                                                                                 |
| CG7966                                    | 208.0  | 398.3  | 481.9  | 0.94  | 1.21  | 0.27  | 7.55E-04 | 8.65E-02 | --- | selenium binding /// selenium binding                                                                                                                                                                                                                                                                                                                                                                                                                                                                                                                                                                                                                                                                                                                                                                                                                                                                                                                                                                                                                                                                                                                                                                                                                                                                                                                                                                                                                                                                                                                                                                                                                                                                                      |
| CG16713                                   | 163.1  | 238.0  | 588.2  | 0.54  | 1.85  | 1.31  | 2.73E-02 | 7.90E-02 | --- | serine-type endopeptidase inhibitor activity /// serine-type endopeptidase inhibitor activity                                                                                                                                                                                                                                                                                                                                                                                                                                                                                                                                                                                                                                                                                                                                                                                                                                                                                                                                                                                                                                                                                                                                                                                                                                                                                                                                                                                                                                                                                                                                                                                                                              |
| CG3604                                    | 70.6   | 151.6  | 163.9  | 1.10  | 1.22  | 0.11  | 3.84E-03 | 2.61E-01 | --- | serine-type endopeptidase inhibitor activity /// serine-type endopeptidase inhibitor activity                                                                                                                                                                                                                                                                                                                                                                                                                                                                                                                                                                                                                                                                                                                                                                                                                                                                                                                                                                                                                                                                                                                                                                                                                                                                                                                                                                                                                                                                                                                                                                                                                              |
| CG11018 /// Larval cuticle protein 4      | 653.1  | 725.1  | 1878.1 | 0.15  | 1.52  | 1.37  | 7.46E-02 | 8.02E-02 | --- | structural constituent of chitin-based cuticle /// structural constituent of chitin-based larval cuticle /// structural constituent of cuticle                                                                                                                                                                                                                                                                                                                                                                                                                                                                                                                                                                                                                                                                                                                                                                                                                                                                                                                                                                                                                                                                                                                                                                                                                                                                                                                                                                                                                                                                                                                                                                             |
| CG13222                                   | 122.7  | 510.8  | 268.2  | 2.06  | 1.13  | -0.93 | 6.05E-03 | 1.82E-02 | --- | structural constituent of chitin-based cuticle /// structural constituent of chitin-based larval cuticle /// structural constituent of cuticle                                                                                                                                                                                                                                                                                                                                                                                                                                                                                                                                                                                                                                                                                                                                                                                                                                                                                                                                                                                                                                                                                                                                                                                                                                                                                                                                                                                                                                                                                                                                                                             |
| CG10625                                   | 681.7  | 1029.9 | 1381.0 | 0.60  | 1.02  | 0.42  | 8.59E-04 | 4.98E-02 | --- | structural constituent of cuticle                                                                                                                                                                                                                                                                                                                                                                                                                                                                                                                                                                                                                                                                                                                                                                                                                                                                                                                                                                                                                                                                                                                                                                                                                                                                                                                                                                                                                                                                                                                                                                                                                                                                                          |
| CG1941                                    | 29.2   | 94.7   | 79.9   | 1.70  | 1.45  | -0.25 | 1.25E-02 | 2.45E-02 | --- | transferase activity, transferring acyl groups other than amino-acyl groups                                                                                                                                                                                                                                                                                                                                                                                                                                                                                                                                                                                                                                                                                                                                                                                                                                                                                                                                                                                                                                                                                                                                                                                                                                                                                                                                                                                                                                                                                                                                                                                                                                                |
| CG4956                                    | 15.5   | 28.8   | 35.7   | 0.90  | 1.21  | 0.31  | 3.29E-02 | 3.22E-01 | --- | zinc ion binding /// metal ion binding                                                                                                                                                                                                                                                                                                                                                                                                                                                                                                                                                                                                                                                                                                                                                                                                                                                                                                                                                                                                                                                                                                                                                                                                                                                                                                                                                                                                                                                                                                                                                                                                                                                                                     |
| Attacin-A                                 | 76.7   | 156.4  | 285.1  | 1.03  | 1.89  | 0.87  | 1.29E-02 | 1.22E-01 | --- | antibacterial humoral response /// antibacterial humoral response /// defense response to bacterium /// defense response to bacterium /// innate immune response /// defense response to Gram-negative bacterium /// defense response to Gram-negative bacterium                                                                                                                                                                                                                                                                                                                                                                                                                                                                                                                                                                                                                                                                                                                                                                                                                                                                                                                                                                                                                                                                                                                                                                                                                                                                                                                                                                                                                                                           |
| CG7860                                    | 564.3  | 1253.9 | 1151.8 | 1.15  | 1.03  | -0.12 | 2.29E-03 | 2.29E-01 | --- | asparagine catabolic process via L-aspartate /// salivary gland cell autophagic cell death /// autophagic cell death                                                                                                                                                                                                                                                                                                                                                                                                                                                                                                                                                                                                                                                                                                                                                                                                                                                                                                                                                                                                                                                                                                                                                                                                                                                                                                                                                                                                                                                                                                                                                                                                       |
| CG11703                                   | 16.3   | 25.5   | 27.6   | 0.64  | 0.76  | 0.11  | 1.22E-01 | 4.48E-01 | --- | ATP biosynthetic process /// potassium ion transport /// sodium ion transport                                                                                                                                                                                                                                                                                                                                                                                                                                                                                                                                                                                                                                                                                                                                                                                                                                                                                                                                                                                                                                                                                                                                                                                                                                                                                                                                                                                                                                                                                                                                                                                                                                              |
| CG17923                                   | 14.9   | 27.1   | 26.6   | 0.86  | 0.83  | -0.03 | 1.31E-01 | 4.88E-01 | --- | ATP biosynthetic process /// transport /// ion transport /// cation transport /// metabolic process /// monovalent inorganic cation transport                                                                                                                                                                                                                                                                                                                                                                                                                                                                                                                                                                                                                                                                                                                                                                                                                                                                                                                                                                                                                                                                                                                                                                                                                                                                                                                                                                                                                                                                                                                                                                              |
| CTP:phosphocholine cytidylyltransferase 2 | 35.5   | 54.3   | 80.9   | 0.61  | 1.19  | 0.58  | 4.01E-02 | 2.13E-01 | --- | biosynthetic process                                                                                                                                                                                                                                                                                                                                                                                                                                                                                                                                                                                                                                                                                                                                                                                                                                                                                                                                                                                                                                                                                                                                                                                                                                                                                                                                                                                                                                                                                                                                                                                                                                                                                                       |
| CG13773                                   | 24.1   | 32.9   | 57.1   | 0.45  | 1.24  | 0.80  | 7.11E-02 | 1.77E-01 | --- | biosynthetic process /// folic acid and derivative biosynthetic process /// folic acid and derivative biosynthetic process                                                                                                                                                                                                                                                                                                                                                                                                                                                                                                                                                                                                                                                                                                                                                                                                                                                                                                                                                                                                                                                                                                                                                                                                                                                                                                                                                                                                                                                                                                                                                                                                 |
| CG15918                                   | 25.4   | 55.0   | 56.7   | 1.11  | 1.16  | 0.04  | 1.26E-02 | 4.04E-01 | --- | carbohydrate metabolic process                                                                                                                                                                                                                                                                                                                                                                                                                                                                                                                                                                                                                                                                                                                                                                                                                                                                                                                                                                                                                                                                                                                                                                                                                                                                                                                                                                                                                                                                                                                                                                                                                                                                                             |
| Imaginal disc growth factor 3             | 22.6   | 40.2   | 55.2   | 0.83  | 1.29  | 0.46  | 2.32E-02 | 1.58E-01 | --- | carbohydrate metabolic process /// chitin catabolic process /// multicellular organismal development /// imaginal disc development                                                                                                                                                                                                                                                                                                                                                                                                                                                                                                                                                                                                                                                                                                                                                                                                                                                                                                                                                                                                                                                                                                                                                                                                                                                                                                                                                                                                                                                                                                                                                                                         |
| CG31169                                   | 44.3   | 48.7   | 92.3   | 0.13  | 1.06  | 0.92  | 6.20E-02 | 1.48E-01 | --- | carbohydrate metabolic process /// glycerol-3-phosphate metabolic process /// glycerol-3-phosphate metabolic process /// metabolic process /// glycerol-3-phosphate catabolic process /// oxidation reduction                                                                                                                                                                                                                                                                                                                                                                                                                                                                                                                                                                                                                                                                                                                                                                                                                                                                                                                                                                                                                                                                                                                                                                                                                                                                                                                                                                                                                                                                                                              |
| CG5322                                    | 134.0  | 253.7  | 347.2  | 0.92  | 1.37  | 0.45  | 4.16E-03 | 2.57E-02 | --- | carbohydrate metabolic process /// mannose metabolic process /// metabolic process                                                                                                                                                                                                                                                                                                                                                                                                                                                                                                                                                                                                                                                                                                                                                                                                                                                                                                                                                                                                                                                                                                                                                                                                                                                                                                                                                                                                                                                                                                                                                                                                                                         |
| CG18473                                   | 94.9   | 189.7  | 144.1  | 1.00  | 0.60  | -0.40 | 2.26E-03 | 1.31E-01 | --- | catabolic process                                                                                                                                                                                                                                                                                                                                                                                                                                                                                                                                                                                                                                                                                                                                                                                                                                                                                                                                                                                                                                                                                                                                                                                                                                                                                                                                                                                                                                                                                                                                                                                                                                                                                                          |
| Muscle protein 20                         | 642.1  | 804.1  | 1290.3 | 0.32  | 1.01  | 0.68  | 1.32E-02 | 1.76E-02 | --- | cell adhesion /// myoblast fusion /// regulation of cell shape                                                                                                                                                                                                                                                                                                                                                                                                                                                                                                                                                                                                                                                                                                                                                                                                                                                                                                                                                                                                                                                                                                                                                                                                                                                                                                                                                                                                                                                                                                                                                                                                                                                             |
| scribbled                                 | 42.6   | 36.2   | 34.4   | -0.24 | -0.31 | -0.07 | 1.93E-01 | 4.25E-01 | --- | cell morphogenesis /// establishment of imaginal disc-derived wing hair orientation /// morphogenesis of a polarized epithelium /// positive regulation of antibacterial peptide biosynthetic process /// multicellular organismal development /// pole cell migration /// dorsal closure /// dorsal closure /// nervous system development /// R3/R4 cell fate commitment /// wing disc morphogenesis /// sensory perception of smell /// asymmetric protein localization /// asymmetric protein localization /// cell proliferation /// negative regulation of cell proliferation /// gonad development /// morphogenesis of embryonic epithelium /// establishment or maintenance of polarity of embryonic epithelium /// morphogenesis of follicular epithelium /// establishment or maintenance of polarity of follicular epithelium /// morphogenesis of larval imaginal disc epithelium /// establishment or maintenance of polarity of larval imaginal disc epithelium /// septate junction assembly /// cell differentiation /// establishment or maintenance of apical/basal cell polarity /// olfactory behavior /// establishment of omnidirectional planar polarity /// response to chemical stimulus /// zonula adherens assembly /// zonula adherens assembly /// establishment or maintenance of epithelial cell apical/basal polarity /// establishment or maintenance of epithelial cell apical/basal polarity /// negative regulation of imaginal disc growth /// positive regulation of heart contraction /// compound eye development /// negative regulation of epithelial cell proliferation /// regulation of synapse structure and activity /// response to stimulus /// regulation of cell cycle |
| CG6726                                    | 180.8  | 450.9  | 382.2  | 1.32  | 1.08  | -0.24 | 1.72E-02 | 6.44E-02 | --- | cellular amino acid metabolic process /// metabolic process                                                                                                                                                                                                                                                                                                                                                                                                                                                                                                                                                                                                                                                                                                                                                                                                                                                                                                                                                                                                                                                                                                                                                                                                                                                                                                                                                                                                                                                                                                                                                                                                                                                                |
| CG14608                                   | 3.9    | 8.1    | 8.1    | 1.06  | 1.07  | 0.01  | 9.12E-02 | 4.94E-01 | --- | chitin metabolic process                                                                                                                                                                                                                                                                                                                                                                                                                                                                                                                                                                                                                                                                                                                                                                                                                                                                                                                                                                                                                                                                                                                                                                                                                                                                                                                                                                                                                                                                                                                                                                                                                                                                                                   |
| CG32656                                   | 191.1  | 837.1  | 791.5  | 2.13  | 2.05  | -0.08 | 5.72E-03 | 3.83E-01 | --- | chitin metabolic process                                                                                                                                                                                                                                                                                                                                                                                                                                                                                                                                                                                                                                                                                                                                                                                                                                                                                                                                                                                                                                                                                                                                                                                                                                                                                                                                                                                                                                                                                                                                                                                                                                                                                                   |
| CG14959                                   | 21.0   | 30.6   | 50.9   | 0.54  | 1.28  | 0.73  | 7.97E-03 | 7.34E-02 | --- | chitin metabolic process                                                                                                                                                                                                                                                                                                                                                                                                                                                                                                                                                                                                                                                                                                                                                                                                                                                                                                                                                                                                                                                                                                                                                                                                                                                                                                                                                                                                                                                                                                                                                                                                                                                                                                   |
| CG7874                                    | 348.6  | 859.2  | 796.7  | 1.30  | 1.19  | -0.11 | 2.62E-05 | 2.91E-01 | --- | chitin metabolic process                                                                                                                                                                                                                                                                                                                                                                                                                                                                                                                                                                                                                                                                                                                                                                                                                                                                                                                                                                                                                                                                                                                                                                                                                                                                                                                                                                                                                                                                                                                                                                                                                                                                                                   |
| CG13439                                   | 31.0   | 121.4  | 66.5   | 1.97  | 1.10  | -0.87 | 1.05E-01 | 1.82E-01 | --- | chitin metabolic process                                                                                                                                                                                                                                                                                                                                                                                                                                                                                                                                                                                                                                                                                                                                                                                                                                                                                                                                                                                                                                                                                                                                                                                                                                                                                                                                                                                                                                                                                                                                                                                                                                                                                                   |
| CG3348                                    | 112.2  | 186.3  | 162.3  | 0.73  | 0.53  | -0.20 | 2.25E-01 | 4.18E-01 | --- | chitin metabolic process                                                                                                                                                                                                                                                                                                                                                                                                                                                                                                                                                                                                                                                                                                                                                                                                                                                                                                                                                                                                                                                                                                                                                                                                                                                                                                                                                                                                                                                                                                                                                                                                                                                                                                   |
| CG14957                                   | 953.0  | 2248.1 | 2562.6 | 1.24  | 1.43  | 0.19  | 1.80E-03 | 6.32E-02 | --- | chitin metabolic process                                                                                                                                                                                                                                                                                                                                                                                                                                                                                                                                                                                                                                                                                                                                                                                                                                                                                                                                                                                                                                                                                                                                                                                                                                                                                                                                                                                                                                                                                                                                                                                                                                                                                                   |
| CG7290                                    | 378.9  | 1560.7 | 1375.4 | 2.04  | 1.86  | -0.18 | 1.78E-02 | 2.15E-01 | --- | chitin metabolic process                                                                                                                                                                                                                                                                                                                                                                                                                                                                                                                                                                                                                                                                                                                                                                                                                                                                                                                                                                                                                                                                                                                                                                                                                                                                                                                                                                                                                                                                                                                                                                                                                                                                                                   |











|                                        |        |       |       |       |       |       |          |          |                                                                                                                                                                                                                                                                                                                                                                                                                                                                                |                                                                                                                                                                                                                                                                                                                                                                                                                                                                                                                  |
|----------------------------------------|--------|-------|-------|-------|-------|-------|----------|----------|--------------------------------------------------------------------------------------------------------------------------------------------------------------------------------------------------------------------------------------------------------------------------------------------------------------------------------------------------------------------------------------------------------------------------------------------------------------------------------|------------------------------------------------------------------------------------------------------------------------------------------------------------------------------------------------------------------------------------------------------------------------------------------------------------------------------------------------------------------------------------------------------------------------------------------------------------------------------------------------------------------|
| dorsal                                 | 37.7   | 20.1  | 21.4  | -0.91 | -0.81 | 0.10  | 1,16E-02 | 3,83E-01 | negative regulation of transcription from RNA polymerase II promoter /// regulation of alternative nuclear mRNA splicing, via spliceosome /// ectodermal cell fate specification /// defense response /// immune response /// immune response /// multicellular organismal development /// gastrulation /// ectoderm development /// ventral cord development /// mesoderm development /// mesodermal cell fate specification /// heart development /// Toll signaling pathway | DNA binding /// DNA binding /// sequence-specific DNA binding transcription factor activity /// sequence-specific DNA binding transcription factor activity /// sequence-specific DNA binding transcription factor activity /// DNA polymerase II transcription factor activity /// protein binding /// morphogen activity /// transcription activator activity /// transcription repressor activity /// sequence-specific DNA binding /// high mobility group box 1 binding /// transcription repressor binding |
| CG7344 /// dystrophin                  | 23.1   | 13.4  | 9.7   | -0.78 | -1.26 | -0.47 | 3,01E-02 | 1,24E-01 | neuromuscular synaptic transmission /// imaginal disc-derived wing vein specification /// muscle organ development /// muscle organ development /// imaginal disc-derived wing vein morphogenesis /// establishment of cell polarity /// muscle cell homeostasis /// regulation of neurotransmitter secretion /// regulation of neurotransmitter secretion /// regulation of short-term neuronal synaptic plasticity                                                           | actin binding /// actin binding /// structural molecule activity /// structural constituent of cytoskeleton /// calcium ion binding /// protein binding /// protein binding /// cytoskeletal protein binding /// zinc ion binding /// structural constituent of muscle /// metal ion binding /// WW domain binding                                                                                                                                                                                               |
| CG9344                                 | 299.7  | 104.9 | 101.2 | -1.51 | -1.57 | -0.05 | 1,21E-02 | 3,80E-01 | nuclear mRNA splicing, via spliceosome                                                                                                                                                                                                                                                                                                                                                                                                                                         | protein binding                                                                                                                                                                                                                                                                                                                                                                                                                                                                                                  |
| hephaestus                             | 313.2  | 214.7 | 155.9 | -0.54 | -1.01 | -0.46 | 2,23E-02 | 1,37E-01 | nuclear mRNA splicing, via spliceosome /// mRNA processing /// Notch signaling pathway /// spermatid development /// negative regulation of oskar mRNA translation /// oocyte microtubule cytoskeleton polarization /// imaginal disc-derived wing vein morphogenesis /// imaginal disc-derived wing margin morphogenesis                                                                                                                                                      | nucleotide binding /// translation repressor activity, nucleic acid binding /// nucleic acid binding /// RNA binding /// mRNA binding /// mRNA 3'-UTR binding /// protein binding /// poly-pyrimidine tract binding /// poly-pyrimidine tract binding                                                                                                                                                                                                                                                            |
| CG11883                                | 140.3  | 78.9  | 72.1  | -0.83 | -0.96 | -0.13 | 1,24E-02 | 2,79E-01 | nucleotide catabolic process                                                                                                                                                                                                                                                                                                                                                                                                                                                   | 5'-nucleotidase activity /// 5'-nucleotidase activity /// hydrolase activity                                                                                                                                                                                                                                                                                                                                                                                                                                     |
| CG30104                                | 330.8  | 54.3  | 64.4  | -2.61 | -2.36 | 0.25  | 5,94E-05 | 4,33E-02 | nucleotide catabolic process                                                                                                                                                                                                                                                                                                                                                                                                                                                   | nucleotide binding /// hydrolase activity /// hydrolase activity, acting on ester bonds /// metal ion binding                                                                                                                                                                                                                                                                                                                                                                                                    |
| Pray For Elves                         | 1.7    | 4.2   | 2.6   | 1.27  | 0.57  | -0.70 | 2,77E-01 | 7,63E-03 | ocellus development                                                                                                                                                                                                                                                                                                                                                                                                                                                            | protein binding                                                                                                                                                                                                                                                                                                                                                                                                                                                                                                  |
| CG5321                                 | 23.5   | 7.5   | 2.3   | -1.65 | -3.37 | -1.72 | 1,55E-02 | 1,87E-01 | oxidation reduction                                                                                                                                                                                                                                                                                                                                                                                                                                                            | gamma-butyrobetaine dioxygenase activity /// gamma-butyrobetaine dioxygenase activity /// oxidoreductase activity                                                                                                                                                                                                                                                                                                                                                                                                |
| Cyp12c1                                | 337.5  | 14.8  | 10.5  | -4.51 | -5.01 | -0.50 | 5,41E-03 | 5,79E-03 | oxidation reduction                                                                                                                                                                                                                                                                                                                                                                                                                                                            | monoxygenase activity /// iron ion binding /// electron carrier activity /// electron carrier activity /// electron carrier activity /// oxidoreductase activity /// heme binding /// metal ion binding                                                                                                                                                                                                                                                                                                          |
| Cyp12e1                                | 141.4  | 92.2  | 63.8  | -0.62 | -1.15 | -0.53 | 6,35E-03 | 1,63E-01 | oxidation reduction                                                                                                                                                                                                                                                                                                                                                                                                                                                            | monoxygenase activity /// iron ion binding /// electron carrier activity /// electron carrier activity /// electron carrier activity /// oxidoreductase activity /// heme binding /// metal ion binding                                                                                                                                                                                                                                                                                                          |
| Cyp309a1                               | 161.4  | 111.2 | 57.3  | -0.54 | -1.49 | -0.96 | 1,94E-02 | 4,58E-02 | oxidation reduction                                                                                                                                                                                                                                                                                                                                                                                                                                                            | monoxygenase activity /// iron ion binding /// electron carrier activity /// electron carrier activity /// electron carrier activity /// oxidoreductase activity /// heme binding /// metal ion binding                                                                                                                                                                                                                                                                                                          |
| Cytochrome P450-4d1                    | 595.0  | 393.7 | 293.7 | -0.60 | -1.02 | -0.42 | 4,36E-03 | 4,94E-02 | oxidation reduction                                                                                                                                                                                                                                                                                                                                                                                                                                                            | monoxygenase activity /// iron ion binding /// electron carrier activity /// electron carrier activity /// electron carrier activity /// oxidoreductase activity /// heme binding /// metal ion binding                                                                                                                                                                                                                                                                                                          |
| Cytochrome P450-4p1                    | 75.3   | 29.3  | 7.2   | -1.36 | -3.39 | -2.03 | 6,38E-03 | 1,06E-02 | oxidation reduction                                                                                                                                                                                                                                                                                                                                                                                                                                                            | monoxygenase activity /// iron ion binding /// protein binding /// electron carrier activity /// electron carrier activity /// electron carrier activity /// oxidoreductase activity /// heme binding /// metal ion binding                                                                                                                                                                                                                                                                                      |
| CG12224                                | 71.9   | 21.7  | 15.5  | -1.73 | -2.22 | -0.49 | 3,32E-03 | 1,36E-01 | oxidation reduction                                                                                                                                                                                                                                                                                                                                                                                                                                                            | oxidoreductase activity /// oxidoreductase activity                                                                                                                                                                                                                                                                                                                                                                                                                                                              |
| CG14882                                | 27.3   | 17.5  | 12.0  | -0.65 | -1.19 | -0.55 | 7,19E-02 | 1,36E-01 | oxidation reduction                                                                                                                                                                                                                                                                                                                                                                                                                                                            | protein binding /// oxidoreductase activity /// [methionine synthase] reductase activity /// [methionine synthase] reductase activity                                                                                                                                                                                                                                                                                                                                                                            |
| Cyp12d1-p /// Cyp12d1-d                | 271.3  | 20.6  | 128.5 | -3.72 | -1.08 | 2.64  | 8,35E-03 | 2,27E-02 | oxidation reduction /// oxidation reduction                                                                                                                                                                                                                                                                                                                                                                                                                                    | monoxygenase activity /// iron ion binding /// electron carrier activity /// electron carrier activity /// electron carrier activity /// oxidoreductase activity /// heme binding /// 1-alpha,25-dihydroxyvitamin D3 24-hydroxylase activity /// metal ion binding                                                                                                                                                                                                                                               |
| Cyp12d1-d                              | 23.1   | 3.8   | 11.3  | -2.61 | -1.03 | 1.59  | 6,90E-03 | 2,90E-03 | oxidation reduction /// oxidation reduction                                                                                                                                                                                                                                                                                                                                                                                                                                    | monoxygenase activity /// iron ion binding /// electron carrier activity /// electron carrier activity /// electron carrier activity /// oxidoreductase activity /// heme binding /// 1-alpha,25-dihydroxyvitamin D3 24-hydroxylase activity /// metal ion binding                                                                                                                                                                                                                                               |
| prolyl-4-hydroxylase-alpha MP          | 28.1   | 13.4  | 17.2  | -1.07 | -0.71 | 0.36  | 4,79E-02 | 1,06E-01 | peptidyl-proline hydroxylation to 4-hydroxy-L-proline /// oxidation reduction                                                                                                                                                                                                                                                                                                                                                                                                  | procollagen-proline 4-dioxygenase activity /// procollagen-proline 4-dioxygenase activity /// iron ion binding /// oxidoreductase activity /// oxidoreductase activity, acting on single donors with incorporation of molecular oxygen, incorporation of two atoms of oxygen /// oxidoreductase activity, acting on paired donors, with incorporation of reduction of molecular oxygen /// L-ascorbic acid binding                                                                                               |
| Eip93F                                 | 102.1  | 51.4  | 50.8  | -0.99 | -1.01 | -0.02 | 6,56E-02 | 4,84E-01 | phagocytosis, engulfment /// autophagy /// activation of caspase activity /// induction of apoptosis by hormones /// larval midgut histolysis /// salivary gland cell autophagic cell death /// salivary gland cell autophagic cell death /// edcysone-mediated induction of salivary gland cell autophagic cell death /// regulation of transcription /// positive regulation of transcription, DNA-dependent /// autophagic cell death /// autophagic cell death             | DNA binding /// DNA binding /// sequence-specific DNA binding transcription factor activity                                                                                                                                                                                                                                                                                                                                                                                                                      |
| CG5991                                 | 213.6  | 96.0  | 99.0  | -1.15 | -1.11 | 0.04  | 2,36E-03 | 2,27E-01 | phospholipid biosynthetic process                                                                                                                                                                                                                                                                                                                                                                                                                                              | phosphatidylserine decarboxylase activity /// phosphatidylserine decarboxylase activity /// lyase activity                                                                                                                                                                                                                                                                                                                                                                                                       |
| secretory Phospholipase A2             | 37.4   | 21.2  | 16.0  | -0.82 | -1.22 | -0.40 | 2,84E-02 | 1,09E-01 | phospholipid metabolic process /// lipid catabolic process                                                                                                                                                                                                                                                                                                                                                                                                                     | phospholipase A2 activity /// phospholipase A2 activity /// phospholipase A2 activity /// calcium ion binding /// calcium-dependent phospholipase A2 activity                                                                                                                                                                                                                                                                                                                                                    |
| Ornithine decarboxylase 2              | 21.1   | 8.7   | 6.5   | -1.28 | -1.70 | -0.42 | 1,53E-03 | 1,22E-01 | polyamine biosynthetic process /// polyamine biosynthetic process                                                                                                                                                                                                                                                                                                                                                                                                              | catalytic activity /// ornithine decarboxylase activity /// ornithine decarboxylase activity /// protein binding /// lyase activity /// carboxyl-lyase activity                                                                                                                                                                                                                                                                                                                                                  |
| CG10830                                | 20.0   | 9.2   | 9.0   | -1.12 | -1.15 | -0.03 | 1,19E-02 | 4,67E-01 | potassium ion transport                                                                                                                                                                                                                                                                                                                                                                                                                                                        | voltage-gated potassium channel activity /// protein binding                                                                                                                                                                                                                                                                                                                                                                                                                                                     |
| CG5096 /// CG5091                      | 109.8  | 75.3  | 37.2  | -0.55 | -1.56 | -1.02 | 6,61E-03 | 2,85E-02 | protein N-linked glycosylation                                                                                                                                                                                                                                                                                                                                                                                                                                                 | protein binding /// protein binding /// transferase activity /// transferase activity, transferring glycosyl groups /// transferase activity, transferring hexosyl groups /// glycosyltransferase activity                                                                                                                                                                                                                                                                                                       |
| CG7156                                 | 53.6   | 32.9  | 25.4  | -0.70 | -1.08 | -0.37 | 1,15E-02 | 6,96E-02 | protein phosphorylation /// cell communication                                                                                                                                                                                                                                                                                                                                                                                                                                 | protein kinase activity /// protein kinase activity /// protein binding /// protein binding /// ATP binding /// phosphoinositide binding                                                                                                                                                                                                                                                                                                                                                                         |
| Pak3                                   | 425.5  | 99.2  | 78.7  | -2.10 | -2.43 | -0.33 | 5,58E-03 | 6,77E-02 | protein phosphorylation /// protein phosphorylation /// actin filament organization                                                                                                                                                                                                                                                                                                                                                                                            | nucleotide binding /// protein kinase activity /// protein serine/threonine kinase activity /// receptor signaling protein serine/threonine kinase activity /// ATP binding /// kinase activity /// transferase activity                                                                                                                                                                                                                                                                                         |
| p38c                                   | 29.9   | 24.4  | 12.9  | -0.29 | -1.21 | -0.92 | 1,12E-02 | 2,13E-03 | protein phosphorylation /// protein phosphorylation /// signal transduction                                                                                                                                                                                                                                                                                                                                                                                                    | nucleotide binding /// protein kinase activity /// protein serine/threonine kinase activity /// MAP kinase activity /// MAP kinase activity /// ATP binding /// kinase activity /// transferase activity                                                                                                                                                                                                                                                                                                         |
| CG8539                                 | 48.2   | 33.6  | 21.9  | -0.52 | -1.14 | -0.62 | 1,70E-02 | 1,35E-01 | proteolysis                                                                                                                                                                                                                                                                                                                                                                                                                                                                    | carboxypeptidase activity /// metalloproteinase activity /// metalloproteinase activity /// metalloproteinase activity /// zinc ion binding /// hydrolase activity                                                                                                                                                                                                                                                                                                                                               |
| CG18585                                | 36.3   | 39.6  | 13.5  | 0.13  | -1.43 | -1.55 | 3,11E-04 | 3,68E-03 | proteolysis                                                                                                                                                                                                                                                                                                                                                                                                                                                                    | carboxypeptidase activity /// metalloproteinase activity /// zinc ion binding /// hydrolase activity                                                                                                                                                                                                                                                                                                                                                                                                             |
| Sarcoplasmic calcium-binding protein 2 | 277.9  | 148.4 | 103.7 | -0.90 | -1.42 | -0.52 | 6,93E-03 | 1,49E-01 | proteolysis                                                                                                                                                                                                                                                                                                                                                                                                                                                                    | catalytic activity /// GTPase activity /// GTPase activity /// endopeptidase activity /// serine-type endopeptidase activity /// calcium ion binding /// calcium ion binding /// calcium ion binding /// protein binding                                                                                                                                                                                                                                                                                         |
| CG33465                                | 68.3   | 50.9  | 32.5  | -0.42 | -1.07 | -0.65 | 4,77E-02 | 1,70E-01 | proteolysis                                                                                                                                                                                                                                                                                                                                                                                                                                                                    | catalytic activity /// serine-type endopeptidase activity                                                                                                                                                                                                                                                                                                                                                                                                                                                        |
| CG30288                                | 24.3   | 15.3  | 13.7  | -0.67 | -0.83 | -0.16 | 5,90E-02 | 4,01E-01 | proteolysis                                                                                                                                                                                                                                                                                                                                                                                                                                                                    | catalytic activity /// serine-type endopeptidase activity /// hydrolase activity                                                                                                                                                                                                                                                                                                                                                                                                                                 |
| CG30286                                | 22.9   | 6.8   | 2.9   | -1.76 | -3.00 | -1.24 | 3,49E-03 | 3,00E-02 | proteolysis                                                                                                                                                                                                                                                                                                                                                                                                                                                                    | catalytic activity /// serine-type endopeptidase activity /// hydrolase activity                                                                                                                                                                                                                                                                                                                                                                                                                                 |
| CG31205                                | 57.4   | 13.3  | 24.7  | -2.11 | -1.22 | 0.90  | 3,99E-02 | 9,14E-03 | proteolysis                                                                                                                                                                                                                                                                                                                                                                                                                                                                    | catalytic activity /// serine-type endopeptidase activity /// hydrolase activity                                                                                                                                                                                                                                                                                                                                                                                                                                 |
| CG30287                                | 40.0   | 25.6  | 16.0  | -0.65 | -1.33 | -0.68 | 3,06E-02 | 5,57E-03 | proteolysis                                                                                                                                                                                                                                                                                                                                                                                                                                                                    | catalytic activity /// serine-type endopeptidase activity /// peptidase activity /// serine-type peptidase activity /// hydrolase activity                                                                                                                                                                                                                                                                                                                                                                       |
| CG30083                                | 166.6  | 11.8  | 33.7  | -3.82 | -2.31 | 1.52  | 5,89E-03 | 5,06E-02 | proteolysis                                                                                                                                                                                                                                                                                                                                                                                                                                                                    | catalytic activity /// serine-type endopeptidase activity /// peptidase activity /// serine-type peptidase activity /// hydrolase activity                                                                                                                                                                                                                                                                                                                                                                       |
| CG30090                                | 86.2   | 31.4  | 28.6  | -1.45 | -1.59 | -0.13 | 6,72E-02 | 3,80E-01 | proteolysis                                                                                                                                                                                                                                                                                                                                                                                                                                                                    | catalytic activity /// serine-type endopeptidase activity /// peptidase activity /// serine-type peptidase activity /// hydrolase activity                                                                                                                                                                                                                                                                                                                                                                       |
| CG3117                                 | 67.1   | 42.7  | 27.6  | -0.65 | -1.28 | -0.63 | 2,24E-02 | 2,31E-02 | proteolysis                                                                                                                                                                                                                                                                                                                                                                                                                                                                    | catalytic activity /// serine-type endopeptidase activity /// serine-type endopeptidase activity /// hydrolase activity                                                                                                                                                                                                                                                                                                                                                                                          |
| CG9672                                 | 269.5  | 203.8 | 43.1  | -0.40 | -2.64 | -2.24 | 8,57E-03 | 2,19E-02 | proteolysis                                                                                                                                                                                                                                                                                                                                                                                                                                                                    | catalytic activity /// serine-type endopeptidase activity /// serine-type endopeptidase activity /// hydrolase activity                                                                                                                                                                                                                                                                                                                                                                                          |
| CG32412                                | 210.3  | 99.2  | 79.6  | -1.08 | -1.40 | -0.32 | 5,30E-04 | 1,15E-01 | proteolysis                                                                                                                                                                                                                                                                                                                                                                                                                                                                    | peptidase activity /// acyltransferase activity /// glutamyl-peptide cyclotransferase activity /// glutamyl-peptide cyclotransferase activity /// glutamyl-peptide cyclotransferase activity /// transferase activity /// hydrolase activity                                                                                                                                                                                                                                                                     |
| CG14642                                | 211.7  | 63.1  | 66.9  | -1.75 | -1.66 | 0.08  | 2,53E-03 | 2,84E-01 | proteolysis /// proteolysis                                                                                                                                                                                                                                                                                                                                                                                                                                                    | catalytic activity /// serine-type endopeptidase activity /// serine-type endopeptidase activity /// peptidase activity /// serine-type peptidase activity /// hydrolase activity                                                                                                                                                                                                                                                                                                                                |
| CG11192                                | 149.4  | 10.1  | 20.3  | -3.89 | -2.88 | 1.01  | 2,70E-02 | 1,31E-01 | proteolysis /// proteolysis                                                                                                                                                                                                                                                                                                                                                                                                                                                    | catalytic activity /// serine-type endopeptidase activity /// serine-type endopeptidase activity /// peptidase activity /// serine-type peptidase activity /// hydrolase activity                                                                                                                                                                                                                                                                                                                                |
| CG18179                                | 707.7  | 27.3  | 44.6  | -4.70 | -3.99 | 0.71  | 1,52E-02 | 3,00E-01 | proteolysis /// proteolysis                                                                                                                                                                                                                                                                                                                                                                                                                                                    | catalytic activity /// serine-type endopeptidase activity /// serine-type endopeptidase activity /// peptidase activity /// serine-type peptidase activity /// hydrolase activity                                                                                                                                                                                                                                                                                                                                |
| CG10472                                | 95.7   | 46.0  | 30.8  | -1.06 | -1.64 | -0.58 | 3,58E-03 | 7,44E-02 | proteolysis /// proteolysis                                                                                                                                                                                                                                                                                                                                                                                                                                                    | catalytic activity /// serine-type endopeptidase activity /// serine-type endopeptidase activity /// protein binding /// peptidase activity /// serine-type peptidase activity /// hydrolase activity                                                                                                                                                                                                                                                                                                            |
| Jonah 74E                              | 1119.8 | 37.8  | 33.9  | -4.89 | -5.04 | -0.16 | 2,51E-03 | 2,66E-01 | proteolysis /// proteolysis                                                                                                                                                                                                                                                                                                                                                                                                                                                    | catalytic activity /// serine-type endopeptidase activity /// serine-type endopeptidase activity /// serine-type endopeptidase activity /// peptidase activity /// serine-type peptidase activity /// hydrolase activity                                                                                                                                                                                                                                                                                         |



|                                                                                              |        |       |       |       |       |       |          |          |                                                                                                                                                                                                                                                                                                                                                                                                                                                                                                                                     |                                                                                                                                                                                                                                                                                                                                                                                                  |
|----------------------------------------------------------------------------------------------|--------|-------|-------|-------|-------|-------|----------|----------|-------------------------------------------------------------------------------------------------------------------------------------------------------------------------------------------------------------------------------------------------------------------------------------------------------------------------------------------------------------------------------------------------------------------------------------------------------------------------------------------------------------------------------------|--------------------------------------------------------------------------------------------------------------------------------------------------------------------------------------------------------------------------------------------------------------------------------------------------------------------------------------------------------------------------------------------------|
| CG10764                                                                                      | 405,0  | 214,7 | 192,9 | -0,92 | -1,07 | -0,15 | 1,33E-02 | 2,86E-01 | proteolysis /// proteolysis                                                                                                                                                                                                                                                                                                                                                                                                                                                                                                         | catalytic activity /// serine-type endopeptidase activity /// serine-type endopeptidase activity /// serine-type endopeptidase activity /// peptidase activity /// serine-type peptidase activity /// hydrolase activity                                                                                                                                                                         |
| CG8329                                                                                       | 281,4  | 9,7   | 23,3  | -4,86 | -3,59 | 1,27  | 2,16E-02 | 9,28E-02 | proteolysis /// proteolysis                                                                                                                                                                                                                                                                                                                                                                                                                                                                                                         | catalytic activity /// serine-type endopeptidase activity /// serine-type endopeptidase activity /// serine-type endopeptidase activity /// peptidase activity /// serine-type peptidase activity /// hydrolase activity                                                                                                                                                                         |
| Jonah 25Bii                                                                                  | 518,7  | 346,5 | 228,2 | -0,58 | -1,18 | -0,60 | 2,60E-02 | 1,56E-01 | proteolysis /// proteolysis                                                                                                                                                                                                                                                                                                                                                                                                                                                                                                         | catalytic activity /// serine-type endopeptidase activity /// serine-type endopeptidase activity /// serine-type endopeptidase activity /// peptidase activity /// serine-type peptidase activity /// hydrolase activity                                                                                                                                                                         |
| CG18477 /// CG31780                                                                          | 389,8  | 257,8 | 105,3 | -0,60 | -1,89 | -1,29 | 1,99E-03 | 5,43E-02 | proteolysis /// proteolysis                                                                                                                                                                                                                                                                                                                                                                                                                                                                                                         | catalytic activity /// serine-type endopeptidase activity /// serine-type endopeptidase activity /// serine-type peptidase activity /// hydrolase activity                                                                                                                                                                                                                                       |
| persephone                                                                                   | 31,0   | 41,8  | 13,1  | 0,43  | -1,25 | -1,68 | 1,02E-02 | 1,18E-02 | proteolysis /// proteolysis /// proteolysis /// proteolysis /// defense response /// positive regulation of antifungal peptide biosynthetic process /// regulation of Toll signaling pathway /// innate immune response /// innate immune response /// defense response to fungus /// defense response to fungus                                                                                                                                                                                                                    | catalytic activity /// serine-type endopeptidase activity /// serine-type endopeptidase activity /// peptidase activity /// peptidase activity /// peptidase activity /// serine-type peptidase activity /// hydrolase activity                                                                                                                                                                  |
| CG10932                                                                                      | 283,3  | 141,5 | 104,0 | -1,00 | -1,45 | -0,44 | 1,46E-04 | 5,05E-04 | pyruvate metabolic process /// fatty acid biosynthetic process /// mitotic spindle organization /// metabolic process                                                                                                                                                                                                                                                                                                                                                                                                               | catalytic activity /// acetyl-CoA C-acetyltransferase activity /// acetyl-CoA C-acetyltransferase activity /// acyltransferase activity /// transferase activity /// transferase activity, transferring acyl groups other than amino-acyl groups                                                                                                                                                 |
| CG1894                                                                                       | 41,3   | 2,4   | 3,8   | -4,08 | -3,44 | 0,64  | 1,44E-02 | 3,53E-01 | regulation of transcription                                                                                                                                                                                                                                                                                                                                                                                                                                                                                                         | histone acetyltransferase activity /// histone acetyltransferase activity /// protein binding /// acyltransferase activity /// transferase activity, transferring acyl groups other than amino-acyl groups                                                                                                                                                                                       |
| extra-extra                                                                                  | 31,3   | 23,6  | 14,4  | -0,40 | -1,12 | -0,71 | 1,36E-01 | 2,04E-01 | regulation of transcription, DNA-dependent /// nervous system development /// axon target recognition /// central nervous system development /// regulation of transcription /// regulation of transcription                                                                                                                                                                                                                                                                                                                        | DNA binding /// sequence-specific DNA binding transcription factor activity /// sequence-specific DNA binding transcription factor activity /// transcription regulator activity /// sequence-specific DNA binding                                                                                                                                                                               |
| reversed polarity                                                                            | 62,9   | 30,6  | 26,7  | -1,04 | -1,24 | -0,20 | 6,44E-03 | 2,48E-01 | regulation of transcription, DNA-dependent /// regulation of transcription from RNA polymerase II promoter /// glial cell differentiation /// regulation of transcription                                                                                                                                                                                                                                                                                                                                                           | DNA binding /// sequence-specific DNA binding transcription factor activity /// RNA polymerase II transcription factor activity /// transcription regulator activity /// sequence-specific DNA binding                                                                                                                                                                                           |
| tailup                                                                                       | 48,0   | 28,8  | 23,8  | -0,74 | -1,01 | -0,27 | 2,01E-03 | 1,55E-01 | regulation of transcription, DNA-dependent /// regulation of transcription from RNA polymerase II promoter /// terminal region determination /// germ-band shortening /// germ-band shortening /// dorsal closure /// dorsal closure /// nervous system development /// motor axon guidance /// head involution /// torso signaling pathway /// bristle morphogenesis /// citrate transport /// notum cell fate specification /// regulation of transcription /// aminogenesis                                                      | DNA binding /// sequence-specific DNA binding transcription factor activity /// specific RNA polymerase II transcription factor activity /// protein binding /// zinc ion binding /// citrate transmembrane transporter activity /// transcription regulator activity /// sequence-specific DNA binding /// metal ion binding                                                                    |
| Heat-shock-protein-70Bc                                                                      | 121,3  | 39,9  | 30,9  | -1,60 | -1,97 | -0,37 | 1,43E-01 | 2,83E-01 | response to hypoxia /// response to hypoxia /// response to stress /// response to unfolded protein /// response to heat /// response to heat /// heat shock-mediated polytene chromosome puffing                                                                                                                                                                                                                                                                                                                                   | nucleotide binding /// ATP binding                                                                                                                                                                                                                                                                                                                                                               |
| Heat-shock-protein-70Bc /// Heat-shock-protein-70Bb /// Heat-shock-protein-70Ba /// Hsp70Bbb | 178,8  | 65,6  | 59,0  | -1,45 | -1,60 | -0,15 | 8,66E-02 | 3,75E-01 | response to hypoxia /// response to hypoxia /// response to stress /// response to unfolded protein /// response to heat /// response to heat /// response to heat /// heat shock-mediated polytene chromosome puffing                                                                                                                                                                                                                                                                                                              | nucleotide binding /// ATP binding                                                                                                                                                                                                                                                                                                                                                               |
| Heat-shock-protein-70Aa /// Heat-shock-protein-70Aa                                          | 302,8  | 223,2 | 140,4 | -0,44 | -1,11 | -0,67 | 1,28E-01 | 2,09E-01 | response to hypoxia /// response to hypoxia /// response to stress /// response to unfolded protein /// response to heat /// response to heat /// response to heat /// heat shock-mediated polytene chromosome puffing                                                                                                                                                                                                                                                                                                              | nucleotide binding /// protein binding /// ATP binding                                                                                                                                                                                                                                                                                                                                           |
| Glial Lazarillo                                                                              | 108,8  | 68,6  | 50,2  | -0,66 | -1,12 | -0,45 | 2,07E-03 | 4,76E-02 | response to hypoxia /// response to stress /// response to stress /// determination of adult lifespan /// response to starvation                                                                                                                                                                                                                                                                                                                                                                                                    | binding /// binding                                                                                                                                                                                                                                                                                                                                                                              |
| CG6673                                                                                       | 89,6   | 52,0  | 43,9  | -0,79 | -1,03 | -0,25 | 3,81E-02 | 1,87E-01 | response to oxidative stress /// metabolic process /// determination of adult lifespan                                                                                                                                                                                                                                                                                                                                                                                                                                              | glutathione transferase activity /// glutathione transferase activity /// glutathione transferase activity /// pyrimidodiazepine synthase activity /// pyrimidodiazepine synthase activity /// protein binding /// transferase activity                                                                                                                                                          |
| methuselah-like 2                                                                            | 144,8  | 44,0  | 39,2  | -1,72 | -1,89 | -0,17 | 1,01E-02 | 2,67E-01 | response to stress /// response to stress /// signal transduction /// cell surface receptor linked signaling pathway /// G-protein coupled receptor protein signaling pathway /// G-protein coupled receptor protein signaling pathway /// determination of adult lifespan                                                                                                                                                                                                                                                          | signal transducer activity /// receptor activity /// transmembrane receptor activity /// G-protein coupled receptor activity /// G-protein coupled receptor activity                                                                                                                                                                                                                             |
| inscuteable                                                                                  | 132,2  | 88,2  | 45,8  | -0,58 | -1,53 | -0,94 | 8,19E-04 | 3,49E-02 | RNA localization /// cytoskeleton organization /// neuroblast fate determination /// peripheral nervous system development /// sensory organ development /// somatic muscle development /// protein localization /// protein localization /// asymmetric protein localization /// asymmetric cell division /// regulation of asymmetric cell division /// establishment of mitotic spindle localization /// establishment of mitotic spindle localization /// establishment of mitotic spindle localization                         | binding /// protein binding /// cytoskeletal adaptor activity /// cytoskeletal adaptor activity                                                                                                                                                                                                                                                                                                  |
| CG16790                                                                                      | 20,5   | 11,4  | 13,9  | -0,84 | -0,56 | 0,28  | 1,95E-01 | 3,52E-01 | RNA metabolic process                                                                                                                                                                                                                                                                                                                                                                                                                                                                                                               | catalytic activity /// protein binding                                                                                                                                                                                                                                                                                                                                                           |
| Ecdysone-induced gene 71Ed                                                                   | 1843,5 | 463,2 | 660,3 | -1,99 | -1,48 | 0,51  | 5,76E-02 | 2,38E-01 | salivary gland cell autophagic cell death /// autophagic cell death                                                                                                                                                                                                                                                                                                                                                                                                                                                                 | ---                                                                                                                                                                                                                                                                                                                                                                                              |
| Oseg4                                                                                        | 30,0   | 20,1  | 14,8  | -0,58 | -1,02 | -0,44 | 2,31E-02 | 5,18E-02 | sensory cilium assembly /// cilium assembly /// cilium assembly                                                                                                                                                                                                                                                                                                                                                                                                                                                                     | binding                                                                                                                                                                                                                                                                                                                                                                                          |
| lectin-28C                                                                                   | 362,6  | 255,9 | 178,8 | -0,50 | -1,02 | -0,52 | 2,90E-02 | 1,06E-01 | signal transduction /// G-protein coupled receptor protein signaling pathway /// G-protein coupled receptor protein signaling pathway /// visual perception /// phototransduction /// phototransduction /// phototransduction /// phototransduction /// adult locomotor behavior /// photoreceptor cell morphogenesis /// response to light intensity /// protein-chromophore linkage /// rhodome development /// negative regulation of compound eye retinal cell programmed cell death /// response to stimulus                   | signal transducer activity /// receptor activity /// G-protein coupled receptor activity /// G-protein coupled receptor activity /// galactose binding /// G-protein coupled photoreceptor activity /// G-protein coupled photoreceptor activity /// photoreceptor activity                                                                                                                      |
| Ras-related protein                                                                          | 502,9  | 377,7 | 229,4 | -0,41 | -1,13 | -0,72 | 4,86E-03 | 1,56E-01 | signal transduction /// small GTPase mediated signal transduction /// border follicle cell migration /// dorsal closure /// innate immune response /// negative regulation of JNK cascade                                                                                                                                                                                                                                                                                                                                           | nucleotide binding /// GTPase activity /// GTPase activity /// GTPase activity /// protein binding /// GTP binding                                                                                                                                                                                                                                                                               |
| nessy                                                                                        | 574,6  | 316,4 | 262,2 | -0,86 | -1,13 | -0,27 | 2,50E-03 | 1,02E-01 | sperm individualization /// germ cell migration                                                                                                                                                                                                                                                                                                                                                                                                                                                                                     | ---                                                                                                                                                                                                                                                                                                                                                                                              |
| Stellate 12D orphan                                                                          | 31,1   | 15,1  | 9,2   | -1,05 | -1,76 | -0,71 | 2,53E-02 | 1,56E-01 | spermatogenesis /// regulation of protein kinase activity                                                                                                                                                                                                                                                                                                                                                                                                                                                                           | protein kinase regulator activity /// protein kinase regulator activity                                                                                                                                                                                                                                                                                                                          |
| longitudinals lacking                                                                        | 32,6   | 17,0  | 15,1  | -0,94 | -1,11 | -0,17 | 9,74E-03 | 1,42E-01 | startle response /// inter-male aggressive behavior /// transcription /// regulation of transcription from RNA polymerase II promoter /// multicellular                                                                                                                                                                                                                                                                                                                                                                             | nucleic acid binding /// DNA binding /// RNA polymerase II transcription factor activity /// specific RNA polymerase II transcription factor activity /// specific                                                                                                                                                                                                                               |
| oH186-F                                                                                      | 112,9  | 33,8  | 23,3  | -1,74 | -2,28 | -0,54 | 5,60E-03 | 3,02E-02 | store-operated calcium entry /// transport /// ion transport /// calcium ion transport /// nervous system development /// regulation of calcium ion transport via store-operated calcium channel activity /// positive regulation of calcium ion transport via store-operated calcium channel activity /// positive regulation of NFAT protein import into nucleus /// positive regulation of calcium ion transport                                                                                                                 | serine-type endopeptidase activity /// ion channel activity /// calcium channel activity /// store-operated calcium channel activity /// store-operated calcium channel activity /// hydrolase activity                                                                                                                                                                                          |
| Tachykinin                                                                                   | 22,8   | 12,0  | 8,1   | -0,93 | -1,50 | -0,57 | 3,22E-02 | 1,55E-01 | tachykinin receptor signaling pathway /// neuropeptide signaling pathway /// neuropeptide signaling pathway /// behavior                                                                                                                                                                                                                                                                                                                                                                                                            | receptor binding /// neuropeptide hormone activity /// neurotransmitter transporter activity /// protein binding                                                                                                                                                                                                                                                                                 |
| sugarbabe                                                                                    | 165,1  | 36,8  | 51,6  | -2,16 | -1,68 | 0,49  | 2,81E-02 | 1,30E-02 | transcription /// multicellular organismal development /// negative regulation of transcription /// regulation of transcription /// positive regulation of transcription                                                                                                                                                                                                                                                                                                                                                            | nucleic acid binding /// DNA binding /// zinc ion binding /// transcription activator activity /// metal ion binding                                                                                                                                                                                                                                                                             |
| buttonhead                                                                                   | 34,9   | 14,5  | 16,0  | -1,27 | -1,13 | 0,14  | 1,30E-02 | 3,53E-01 | transcription /// regulation of transcription from RNA polymerase II promoter /// cephalic furrow formation /// specification of segmental identity, head /// head segmentation /// anterior head segmentation /// posterior head segmentation /// regulation of transcription /// positive regulation of transcription, DNA-dependent /// positive regulation of transcription from RNA polymerase II promoter                                                                                                                     | nucleic acid binding /// DNA binding /// RNA polymerase II transcription factor activity /// protein binding /// transcription factor binding /// zinc ion binding /// transcription activator activity /// metal ion binding                                                                                                                                                                    |
| cap-n-collar                                                                                 | 826,0  | 384,5 | 269,5 | -1,10 | -1,62 | -0,51 | 4,03E-03 | 1,04E-01 | transcription /// regulation of transcription, DNA-dependent /// multicellular organismal development /// oocyte dorsal/ventral axis specification /// regulation of pole plasm oskar mRNA localization /// blastoderm segmentation /// oocyte microtubule cytoskeleton polarization /// regulation of bicoid mRNA localization /// maintenance of oocyte nucleus location involved in oocyte dorsal/ventral axis specification /// regulation of transcription /// bicoid mRNA localization /// pole plasm oskar mRNA localization | DNA binding /// DNA binding /// sequence-specific DNA binding transcription factor activity /// sequence-specific DNA binding transcription factor activity /// RNA polymerase II transcription factor activity /// protein binding /// transcription activator activity /// sequence-specific DNA binding /// protein heterodimerization activity /// protein dimerization activity             |
| midline                                                                                      | 115,6  | 54,9  | 48,1  | -1,07 | -1,26 | -0,19 | 5,64E-02 | 2,88E-01 | transcription /// regulation of transcription, DNA-dependent /// regulation of transcription                                                                                                                                                                                                                                                                                                                                                                                                                                        | DNA binding /// sequence-specific DNA binding transcription factor activity                                                                                                                                                                                                                                                                                                                      |
| ventral veins lacking                                                                        | 57,2   | 52,9  | 26,8  | -0,11 | -1,09 | -0,98 | 4,12E-02 | 5,86E-02 | transcription /// regulation of transcription, DNA-dependent /// regulation of transcription, DNA-dependent /// brain development /// peripheral nervous system development /// peripheral nervous system development /// epithelial cell fate determination, open tracheal system /// motor axon guidance /// brain segmentation /// regulation of transcription /// dendrite morphogenesis                                                                                                                                        | DNA binding /// DNA binding /// sequence-specific DNA binding transcription factor activity /// sequence-specific DNA binding transcription factor activity /// RNA polymerase II transcription factor activity /// protein binding /// transcription regulator activity /// sequence-specific DNA binding                                                                                       |
| Ecdysone-induced protein 75B                                                                 | 108,8  | 98,9  | 51,3  | -0,14 | -1,09 | -0,95 | 1,99E-02 | 2,38E-02 | transcription /// regulation of transcription, DNA-dependent /// regulation of transcription, DNA-dependent /// multicellular organismal development /// regulation of ecdysteroid metabolic process /// molting cycle, chitin-based cuticle /// molting cycle, chitin-based cuticle /// ecdysis, chitin-based cuticle /// antimicrobial humoral response /// ecdysone-mediated induction of salivary gland cell autophagic cell death /// regulation of transcription /// oogenesis                                                | DNA binding /// sequence-specific DNA binding transcription factor activity /// specific RNA polymerase II transcription factor activity /// steroid hormone receptor activity /// receptor activity /// ligand-dependent nuclear receptor activity /// ligand-dependent nuclear receptor activity /// zinc ion binding /// heme binding /// sequence-specific DNA binding /// metal ion binding |
| Checkpoint suppressor homologue                                                              | 81,3   | 78,0  | 40,5  | -0,06 | -1,01 | -0,95 | 3,82E-02 | 5,50E-02 | transcription /// regulation of transcription, DNA-dependent /// regulation of transcription, DNA-dependent /// phagocytosis, engulfment /// regulation of transcription                                                                                                                                                                                                                                                                                                                                                            | DNA binding /// sequence-specific DNA binding transcription factor activity /// sequence-specific DNA binding transcription factor activity /// binding /// sequence-specific DNA binding                                                                                                                                                                                                        |
| CG17327                                                                                      | 88,9   | 37,9  | 34,4  | -1,23 | -1,37 | -0,14 | 2,38E-02 | 3,29E-01 | translation                                                                                                                                                                                                                                                                                                                                                                                                                                                                                                                         | aminoacyl-tRNA hydrolase activity                                                                                                                                                                                                                                                                                                                                                                |
| mitochondrial ribosomal protein S28 /// mrpS28                                               | 175,3  | 81,3  | 82,7  | -1,11 | -1,08 | 0,02  | 2,00E-02 | 3,81E-01 | translation                                                                                                                                                                                                                                                                                                                                                                                                                                                                                                                         | structural constituent of ribosome                                                                                                                                                                                                                                                                                                                                                               |
| CG4630                                                                                       | 70,4   | 42,4  | 30,9  | -0,73 | -1,19 | -0,46 | 9,14E-03 | 1,75E-01 | transmembrane transport                                                                                                                                                                                                                                                                                                                                                                                                                                                                                                             | carlinitine transporter activity                                                                                                                                                                                                                                                                                                                                                                 |
| CG3649                                                                                       | 41,3   | 14,2  | 16,2  | -1,54 | -1,35 | 0,19  | 4,59E-03 | 1,27E-01 | transmembrane transport                                                                                                                                                                                                                                                                                                                                                                                                                                                                                                             | high affinity inorganic phosphate:sodium symporter activity /// protein binding                                                                                                                                                                                                                                                                                                                  |
| CG14511                                                                                      | 34,5   | 19,6  | 15,7  | -0,81 | -1,13 | -0,32 | 1,06E-02 | 9,35E-03 | transmembrane transport                                                                                                                                                                                                                                                                                                                                                                                                                                                                                                             | UDP-N-acetylglucosamine transmembrane transporter activity                                                                                                                                                                                                                                                                                                                                       |

|                                            |        |        |       |       |       |       |          |          |                                                                                                                                                                                                                                                                                                                                                                                                               |                                                                                                                                                                                                                                       |
|--------------------------------------------|--------|--------|-------|-------|-------|-------|----------|----------|---------------------------------------------------------------------------------------------------------------------------------------------------------------------------------------------------------------------------------------------------------------------------------------------------------------------------------------------------------------------------------------------------------------|---------------------------------------------------------------------------------------------------------------------------------------------------------------------------------------------------------------------------------------|
| CG5973                                     | 82.7   | 49.2   | 23.2  | -0.75 | -1.83 | -1.08 | 1.05E-03 | 1.55E-02 | transport                                                                                                                                                                                                                                                                                                                                                                                                     | transporter activity /// protein binding /// retinal binding                                                                                                                                                                          |
| CG3091                                     | 48.0   | 35.5   | 23.5  | -0.43 | -1.03 | -0.60 | 5.19E-03 | 1.52E-02 | transport                                                                                                                                                                                                                                                                                                                                                                                                     | transporter activity /// vitamin E binding                                                                                                                                                                                            |
| ripped pocket                              | 26.4   | 7.3    | 7.4   | -1.85 | -1.83 | 0.02  | 9.18E-03 | 4.51E-01 | transport /// ion transport /// sodium ion transport                                                                                                                                                                                                                                                                                                                                                          | ion channel activity /// sodium channel activity /// sodium channel activity /// sodium channel activity /// ligand-gated sodium channel activity                                                                                     |
| Histamine-gated chloride channel subunit 1 | 45.6   | 13.6   | 15.4  | -1.75 | -1.57 | 0.18  | 9.45E-03 | 1.85E-01 | transport /// ion transport /// thermotaxis                                                                                                                                                                                                                                                                                                                                                                   | ion channel activity /// extracellular ligand-gated ion channel activity /// extracellular-glycine-gated ion channel activity /// histamine-gated chloride channel activity                                                           |
| Lipid storage droplet-1                    | 1314.9 | 1322.9 | 636.3 | 0.01  | -1.05 | -1.06 | 6.64E-05 | 5.57E-03 | transport /// lipid transport /// lipid transport /// lipid storage /// lipid storage                                                                                                                                                                                                                                                                                                                         | protein binding                                                                                                                                                                                                                       |
| CG8193                                     | 304.4  | 44.0   | 50.9  | -2.79 | -2.58 | 0.21  | 1.99E-02 | 3.16E-01 | transport /// metabolic process /// melanin biosynthetic process /// oxidation reduction                                                                                                                                                                                                                                                                                                                      | monooxygenase activity /// monophenol monooxygenase activity /// monophenol monooxygenase activity /// oxygen transporter activity /// oxidoreductase activity /// metal ion binding                                                  |
| Black cells                                | 215.1  | 22.3   | 24.8  | -3.27 | -3.12 | 0.15  | 2.71E-02 | 3.78E-01 | transport /// metabolic process /// oxidation reduction                                                                                                                                                                                                                                                                                                                                                       | catechol oxidase activity /// monophenol monooxygenase activity /// monophenol monooxygenase activity /// oxygen transporter activity /// oxidoreductase activity                                                                     |
| CG33282                                    | 105.6  | 76.0   | 18.7  | -0.47 | -2.50 | -2.03 | 8.89E-03 | 5.31E-03 | transport /// monosaccharide transport /// transmembrane transport                                                                                                                                                                                                                                                                                                                                            | transporter activity /// monosaccharide transmembrane transporter activity                                                                                                                                                            |
| CG850                                      | 179.6  | 60.1   | 70.5  | -1.58 | -1.35 | 0.23  | 7.07E-03 | 1.88E-01 | transport /// neurotransmitter transport /// neurotransmitter transport                                                                                                                                                                                                                                                                                                                                       | neurotransmitter transporter activity /// neurotransmitter:sodium symporter activity /// symporter activity /// potassium:amino acid symporter activity                                                                               |
| CG1967                                     | 142.7  | 147.2  | 48.7  | 0.04  | -1.55 | -1.80 | 3.15E-02 | 3.99E-02 | transport /// post-Golgi vesicle-mediated transport                                                                                                                                                                                                                                                                                                                                                           | transporter activity                                                                                                                                                                                                                  |
| Odorant-binding protein 50d                | 27.5   | 2.0    | 9.7   | -3.78 | -1.50 | 2.28  | 2.41E-02 | 2.42E-02 | transport /// sensory perception of chemical stimulus                                                                                                                                                                                                                                                                                                                                                         | odorant binding /// odorant binding                                                                                                                                                                                                   |
| Odorant-binding protein 83ef               | 366.6  | 146.2  | 140.4 | -1.33 | -1.38 | -0.06 | 3.26E-03 | 4.10E-01 | transport /// sensory perception of chemical stimulus /// sensory perception of chemical stimulus                                                                                                                                                                                                                                                                                                             | odorant binding /// odorant binding /// odorant binding /// odorant binding                                                                                                                                                           |
| Odorant-binding protein 56a                | 106.1  | 49.3   | 48.7  | -1.10 | -1.12 | -0.02 | 1.93E-02 | 4.52E-01 | transport /// sensory perception of chemical stimulus /// sensory perception of chemical stimulus /// sensory perception of smell /// sensory perception of smell /// response to pheromone /// olfactory behavior /// response to stimulus                                                                                                                                                                   | protein binding /// odorant binding /// odorant binding /// odorant binding /// odorant binding                                                                                                                                       |
| Epidermal stripes and patches              | 226.8  | 99.2   | 102.2 | -1.19 | -1.15 | 0.04  | 1.61E-02 | 3.41E-01 | transport /// sulfate transport /// transmembrane transport                                                                                                                                                                                                                                                                                                                                                   | transporter activity /// secondary active sulfate transmembrane transporter activity /// secondary active sulfate transmembrane transporter activity                                                                                  |
| CG5805                                     | 700.7  | 331.4  | 346.6 | -1.08 | -1.02 | 0.06  | 3.16E-02 | 3.65E-01 | transport /// transmembrane transport                                                                                                                                                                                                                                                                                                                                                                         | transporter activity /// binding /// transmembrane transporter activity                                                                                                                                                               |
| CG8323                                     | 72.3   | 40.4   | 35.1  | -0.84 | -1.04 | -0.20 | 1.12E-02 | 1.90E-01 | transport /// transmembrane transport                                                                                                                                                                                                                                                                                                                                                                         | transporter activity /// binding /// transmembrane transporter activity                                                                                                                                                               |
| CG8654                                     | 157.8  | 50.1   | 68.2  | -1.66 | -1.21 | 0.45  | 1.28E-03 | 1.64E-01 | transport /// transmembrane transport                                                                                                                                                                                                                                                                                                                                                                         | transporter activity /// secondary active organic cation transmembrane transporter activity                                                                                                                                           |
| CG7342                                     | 262.5  | 146.1  | 125.3 | -0.85 | -1.07 | -0.22 | 1.70E-03 | 1.74E-01 | transport /// transmembrane transport                                                                                                                                                                                                                                                                                                                                                                         | transporter activity /// secondary active organic cation transmembrane transporter activity                                                                                                                                           |
| CG6836                                     | 24.6   | 7.7    | 5.6   | -1.67 | -2.13 | -0.46 | 7.41E-04 | 8.07E-02 | transport /// transport                                                                                                                                                                                                                                                                                                                                                                                       | transporter activity                                                                                                                                                                                                                  |
| lethal (1) G0155                           | 160.1  | 55.1   | 64.4  | -1.54 | -1.31 | 0.22  | 1.54E-03 | 2.72E-02 | transport /// vesicle-mediated transport /// vesicle-mediated transport                                                                                                                                                                                                                                                                                                                                       | SNAP receptor activity                                                                                                                                                                                                                |
| fat facets                                 | 23.6   | 3.9    | 2.5   | -2.61 | -3.24 | -0.63 | 2.34E-02 | 3.07E-01 | ubiquitin-dependent protein catabolic process /// ubiquitin-dependent protein catabolic process /// endocytosis /// nuclear migration /// multicellular organismal development /// cellularization /// visual perception /// germ cell migration /// mystery cell fate differentiation /// mystery cell fate differentiation /// embryo development /// protein deubiquitination /// protein deubiquitination | ubiquitin thiolesterase activity /// ubiquitin-specific protease activity /// ubiquitin specific protease activity /// binding /// protein binding /// peptidase activity /// cysteine-type peptidase activity /// hydrolase activity |
| CG13030 /// GA11985                        | 76.8   | 11.8   | 20.8  | -2.71 | -1.89 | 0.82  | 1.66E-03 | 1.72E-01 | ubiquitin-dependent protein catabolic process /// ubiquitin-dependent protein catabolic process /// multicellular organismal development /// sensory organ development /// proteasomal protein catabolic process /// protein ubiquitination /// regulation of R7 cell differentiation                                                                                                                         | ubiquitin-protein ligase activity /// protein binding /// protein binding /// zinc ion binding /// ligase activity /// ligase activity /// metal ion binding                                                                          |
